# Supplementary material for: Low-dose CT hounsfield units: a reliable methodology for assessing vertebral bone density in radiographic axial spondyloarthritis
Source: HighWire-hosted journal article supplement (doi:10.1136/rmdopen-2021-002149), 2022-06-01
Supplement: rmdopen-2021-002149supp001_data_supplement.pdf [file rmdopen-2021-002149supp001_data_supplement.pdf]

## SUPPLEMENTARY DATA

### Table of content

|                                                                                                                                                                                                           | Page           |
|-----------------------------------------------------------------------------------------------------------------------------------------------------------------------------------------------------------|----------------|
| <b>Supplementary Text S1.</b> Sample size calculation                                                                                                                                                     | <b>1</b>       |
| <b>Supplementary Table S1.</b> Baseline characteristics of patients with r-axSpA                                                                                                                          | <b>2</b>       |
| <b>Supplementary Table S2.</b> Descriptive statistics of Hounsfield Units (HU)* values stratified by center (Leiden vs. Herne)                                                                            | <b>3</b>       |
| <b>Supplementary Table S3.</b> Type of artifacts and incident density abnormalities that affect HU measurements and their distribution at the vertebral level, as reported by at least one of the readers | <b>4</b>       |
| <b>Supplementary Table S4.</b> Descriptive statistics of Hounsfield Units (HU) repeated measurements from reader 1, intra-reader reliability and agreement for each vertebra                              | <b>5</b>       |
| <b>Supplementary Figures S1-S19.</b> Bland-Altman plots for C4-C7; T2-T12 and L2-L5 HU scores                                                                                                             | <b>6 to 15</b> |
| <b>Supplementary Figure S20.</b> Representative examples of Bland-Altman plots for the repeated measurements from reader 1 (C3, T1, L1).                                                                  | <b>16</b>      |

**Supplementary Text S1.** Sample size calculation

An adequate sample size is important to obtain an acceptable confidence interval (CI) around the reliability parameter. For the present study, we can calculate how many vertebrae (unit of analysis) are necessary to reach a prespecified confidence interval (CI) for a certain intraclass correlation coefficient (ICC). The following formula was used for the calculation of the sample size  $n$ :

$$n = \frac{8z_{1-\alpha/2}^2(1-ICC)^2[1+(m-1)ICC]^2}{m(m-1)w^2}$$

In this formula,  $m$  stands for the number of measurements per unit of analysis and  $w$  stands for the total width of the  $100(1-\alpha)\%$  CI for ICC, i.e.  $w = 0.2$  for a CI  $\pm 0.1$ .

An ICC of  $\geq 0.85$  was considered acceptable for the present study. Low dose CT measurements of Hounsfield Units was performed by two readers, therefore the number of measurements per vertebra,  $m$ , is 2. The required sample size aiming for an ICC of 0.80, 0.85 and 0.90, considering a CI of  $95\% \pm 0.1$ , in which  $w = 0.2$  is presented below.

| ICC target value →          | ICC = 0.80       | ICC = 0.85       | ICC = 0.90       |
|-----------------------------|------------------|------------------|------------------|
| ↓ $m$ repeated measurements | 95% CI $\pm 0.1$ | 95% CI $\pm 0.1$ | 95% CI $\pm 0.1$ |
| 2                           | 50               | 30               | 14               |

**Conclusion:**

For the current study, ICCs were computed for each vertebral level individually (from C3 to L5). The sample size of 50 vertebrae per level is adequate to assess the pre-defined ICCs of 0.80 or higher with a 95% CI  $\pm 0.1$ .

**Supplementary Table S1.** Baseline characteristics of patients with r-axSpA

| <b>Assessment</b>                      | <b>N=50*§</b> |
|----------------------------------------|---------------|
| Male, no. (%)                          | 43 (86.0)     |
| Age, years                             | 49.1 (9.9)    |
| Body Mass Index, kg/m <sup>2</sup>     | 26.6 (4.2)    |
| HLA-B27 positive, no. (%)              | 42 (84.0)     |
| ASDAS-CRP                              | 2.6 (1.2)     |
| TNFi treatment, no. (%)                | 12 (24.0)     |
| NSAIDs treatment, no. (%)              | 32 (64.0)     |
| Patients with syndesmophytes#, no. (%) | 50 (100.0)    |
| Patients with MRI BME¥, no. (%)        | 47 (94.0)     |
| Cervical spine HU**                    | 320 (104.7)   |
| Thoracic spine HU**                    | 197 (70.7)    |
| Lumbar spine HU**                      | 157 (63.5)    |

\*Data is presented as mean (SD) or no. (%). **ASDAS**, Ankylosing Spondylitis Disease Activity Score; **BME**, bone marrow edema; **CRP**, C-reactive protein levels; **HLA**, human leucocyte antigen; **HU**, Hounsfield units; **NSAIDs**, non-steroidal anti-inflammatory drugs; **TNFi**, Tumor necrosis factor inhibitors.

#Defined as a patient with at least one quadrant that received a CT Syndesmophytes Score  $\geq 1$  (absolute agreement of two readers). ¥ Defined as a patient with at least one quadrant with MRI BME (agreement of 2 out of 3 readers).

\*\*Considering the average of the two readers' scores.

**Supplementary Table S2.** Descriptive statistics of Hounsfield Units (HU)\* values stratified by center (Leiden vs. Herne)

| Vertebra§ | Leiden       |            | Herne        |            |
|-----------|--------------|------------|--------------|------------|
|           | Mean (SD) HU | Range HU   | Mean (SD) HU | Range HU   |
| C3        | 326 (88)     | 185 to 553 | 382 (116)    | 160 to 645 |
| C4        | 300 (91)     | 120 to 486 | 395 (113)    | 149 to 664 |
| C5        | 285 (99)     | 85 to 481  | 374 (98)     | 207 to 603 |
| C6        | 253 (76)     | 82 to 440  | 323 (86)     | 135 to 480 |
| C7        | 230 (79)     | 80 to 401  | 305 (70)     | 152 to 443 |
| T1        | 204 (67)     | 68 to 331  | 247 (101)    | 99 to 429  |
| T2        | 259 (43)     | 201 to 368 | 218 (67)     | 56 to 383  |
| T3        | 252 (60)     | 154 to 403 | 193 (66)     | 89 to 332  |
| T4        | 240 (45)     | 168 to 334 | 178 (73)     | 42 to 308  |
| T5        | 228 (50)     | 155 to 365 | 178 (63)     | 56 to 271  |
| T6        | 224 (40)     | 160 to 317 | 164 (71)     | 31 to 282  |
| T7        | 205 (44)     | 130 to 327 | 168 (95)     | -8 to 356  |
| T8        | 198 (43)     | 128 to 283 | 155 (79)     | 5 to 300   |
| T9        | 197 (47)     | 121 to 304 | 163 (86)     | -13 to 301 |
| T10       | 193 (61)     | 89 to 373  | 167 (81)     | 21 to 359  |
| T11       | 169 (50)     | 83 to 271  | 167 (72)     | 30 to 303  |
| T12       | 159 (42)     | 78 to 244  | 177 (72)     | 25 to 369  |
| L1        | 161 (42)     | 80 to 226  | 167 (66)     | 8 to 321   |
| L2        | 161 (43)     | 60 to 221  | 146 (59)     | -11 to 255 |
| L3        | 148 (45)     | -8 to 238  | 155 (83)     | -35 to 344 |
| L4        | 169 (78)     | -13 to 460 | 144 (86)     | -36 to 359 |
| L5        | 153 (54)     | 10 to 252  | 164 (72)     | 31 to 286  |

§ Cervical spine values are based on a total of 44 vertebrae scored at each level (C3 to C7) by both readers. The values for thoracic and lumbar spine are based on a total of 49 vertebrae scored at each level (T1 to L5) by both readers.

\*Considering the average of the two readers' scores.

**Supplementary Table S3.** Type of artifacts and incident density abnormalities that affect HU measurements and their distribution at the vertebral level, as reported by at least one of the readers

| Vertebral level      | Artifacts and density abnormalities that affect HU measurement |                              |                  |                   |                   | Total     |
|----------------------|----------------------------------------------------------------|------------------------------|------------------|-------------------|-------------------|-----------|
|                      | Photon starvation                                              | Imaging noise (poor quality) | Fat infiltration | Sclerotic changes | Vascular changes* |           |
| C3                   |                                                                |                              |                  |                   |                   | 0         |
| C4                   |                                                                |                              |                  | 2                 |                   | 2         |
| C5                   |                                                                |                              |                  | 1                 |                   | 1         |
| C6                   | 1                                                              |                              |                  | 2                 |                   | 3         |
| C7                   | 3                                                              |                              |                  | 2                 |                   | 5         |
| T1                   | 13                                                             |                              |                  | 3                 |                   | 16        |
| T2                   | 1                                                              |                              |                  | 0                 |                   | 1         |
| T3                   | 1                                                              |                              |                  | 2                 |                   | 3         |
| T4                   |                                                                |                              |                  | 3                 |                   | 3         |
| T5                   |                                                                |                              |                  | 1                 |                   | 1         |
| T6                   |                                                                |                              |                  | 1                 |                   | 1         |
| T7                   |                                                                |                              | 1                | 2                 |                   | 3         |
| T8                   |                                                                |                              |                  | 2                 |                   | 2         |
| T9                   |                                                                |                              | 1                | 3                 |                   | 4         |
| T10                  |                                                                |                              |                  | 3                 | 1                 | 4         |
| T11                  |                                                                | 1                            |                  |                   |                   | 1         |
| T12                  |                                                                | 3                            |                  | 1                 | 1                 | 5         |
| L1                   |                                                                | 1                            |                  | 1                 |                   | 2         |
| L2                   |                                                                | 3                            | 1                |                   |                   | 4         |
| L3                   |                                                                | 3                            | 2                |                   |                   | 5         |
| L4                   |                                                                | 1                            | 2                | 1                 |                   | 3         |
| L5                   |                                                                | 1                            |                  | 1                 |                   | 3         |
| Total of artefacts % | 18 (25%)                                                       | 14 (19%)                     | 7 (10%)          | 31 (43%)          | 2 (3%)            | 72 (100%) |

**Legend:** Colour code - green:  $\leq 1$  artifact/density abnormalities that affect HU measurement; yellow: 2 to 4 artifacts/ density abnormalities that affect HU measurement; orange:  $\geq 5$  artifacts/ density abnormalities that affect HU measurement.

\*Including haemangiomas.

**Supplementary Table S4.** Descriptive statistics of Hounsfield Units (HU) repeated measurements from reader 1, intra-reader reliability and agreement for each vertebra

| Vertebra§ | First assessment of HU |            | Second assessment of HU |            | ICC  | SDD |
|-----------|------------------------|------------|-------------------------|------------|------|-----|
|           | Mean (SD)              | Range      | Mean (SD)               | Range      |      |     |
| C3        | 304 (99)               | 162 to 469 | 303 (100)               | 158 to 464 | 0.98 | 5   |
| C4        | 293 (108)              | 137 to 465 | 293 (107)               | 141 to 462 | 1.00 | 4   |
| C5        | 313 (92)               | 175 to 425 | 314 (91)                | 176 to 421 | 0.98 | 4   |
| C6        | 289 (101)              | 152 to 481 | 288 (100)               | 148 to 479 | 0.98 | 5   |
| C7        | 273 (88)               | 119 to 401 | 273 (85)                | 124 to 398 | 0.96 | 6   |
| T1        | 244 (86)               | 102 to 411 | 246 (86)                | 100 to 409 | 0.98 | 4   |
| T2        | 227 (59)               | 113 to 309 | 228 (59)                | 115 to 311 | 0.96 | 4   |
| T3        | 203 (65)               | 89 to 275  | 204 (66)                | 93 to 277  | 0.96 | 4   |
| T4        | 173 (67)               | 42 to 244  | 175 (66)                | 47 to 249  | 0.99 | 4   |
| T5        | 189 (52)               | 102 to 262 | 188 (51)                | 103 to 259 | 0.94 | 4   |
| T6        | 178 (65)               | 31 to 266  | 178 (65)                | 32 to 265  | 0.95 | 5   |
| T7        | 158 (74)               | -9 to 243  | 159 (73)                | -7 to 245  | 0.99 | 2   |
| T8        | 153 (75)               | 7 to 248   | 154 (76)                | 3 to 254   | 0.96 | 5   |
| T9        | 158 (80)               | -15 to 284 | 158 (80)                | -11 to 281 | 0.96 | 5   |
| T10       | 172 (87)               | 19 to 356  | 174 (88)                | 23 to 363  | 0.95 | 5   |
| T11       | 151 (62)               | 31 to 254  | 150 (61)                | 30 to 252  | 0.96 | 4   |
| T12       | 180 (74)               | 96 to 370  | 180 (76)                | 96 to 370  | 0.97 | 5   |
| L1        | 171 (65)               | 93 to 325  | 171 (62)                | 98 to 321  | 0.92 | 6   |
| L2        | 148 (45)               | 87 to 217  | 148 (45)                | 89 to 215  | 0.94 | 4   |
| L3        | 135 (31)               | 88 to 181  | 135 (31)                | 83 to 183  | 0.98 | 4   |
| L4        | 132 (55)               | 32 to 218  | 131 (55)                | 28 to 213  | 0.93 | 5   |
| L5        | 136 (46)               | 75 to 195  | 135 (44)                | 77 to 192  | 0.98 | 5   |

ICC – intraclass correlation coefficients; SDD – smallest detectable difference. § 10 vertebrae were re-assessed at each level.

\*Two-way mixed effects method, single measurements, absolute agreement.

# SDD =  $1.96 \times SD_{\text{difference}} / (\sqrt{k})$ ;  $SD_{\text{difference}}$  is the standard deviation of the differences in status scores between two measurements; k is the number of measurements (n=2).

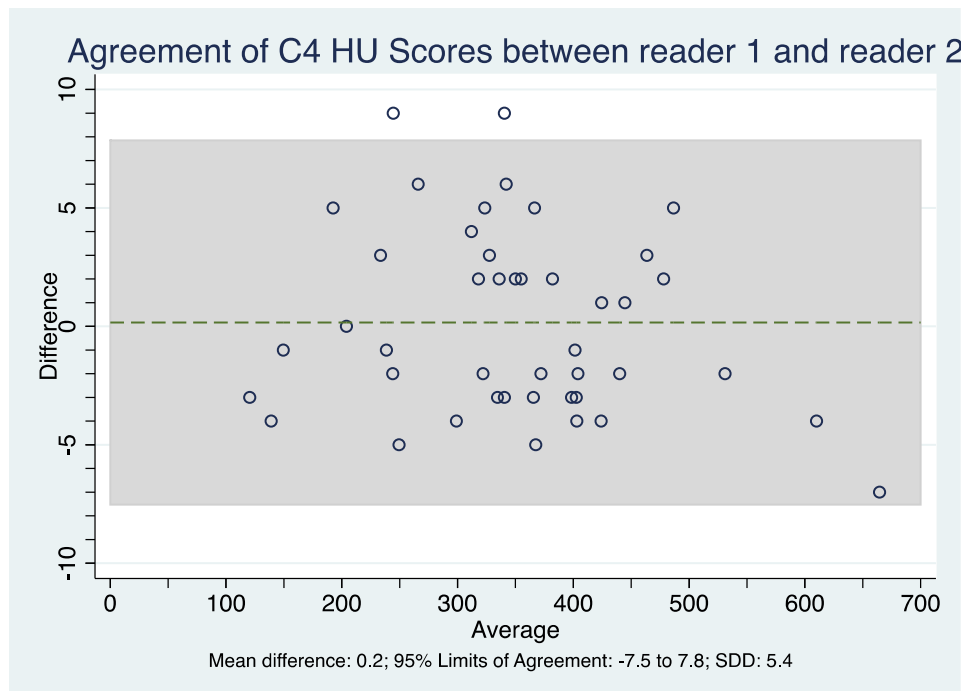

**Supplementary Figure S1.** Bland-Altman plot for C4 HU scores. HU – Hounsfield Units; SDD – smallest detectable difference

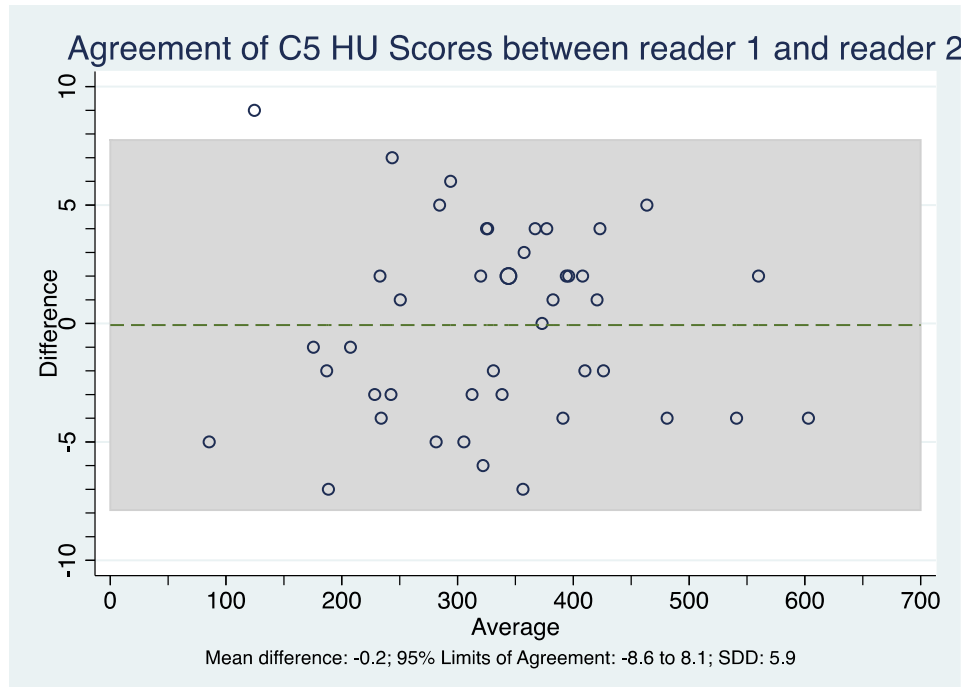

**Supplementary Figure S2.** Bland-Altman plot for C5 HU scores. HU – Hounsfield Units; SDD – smallest detectable difference

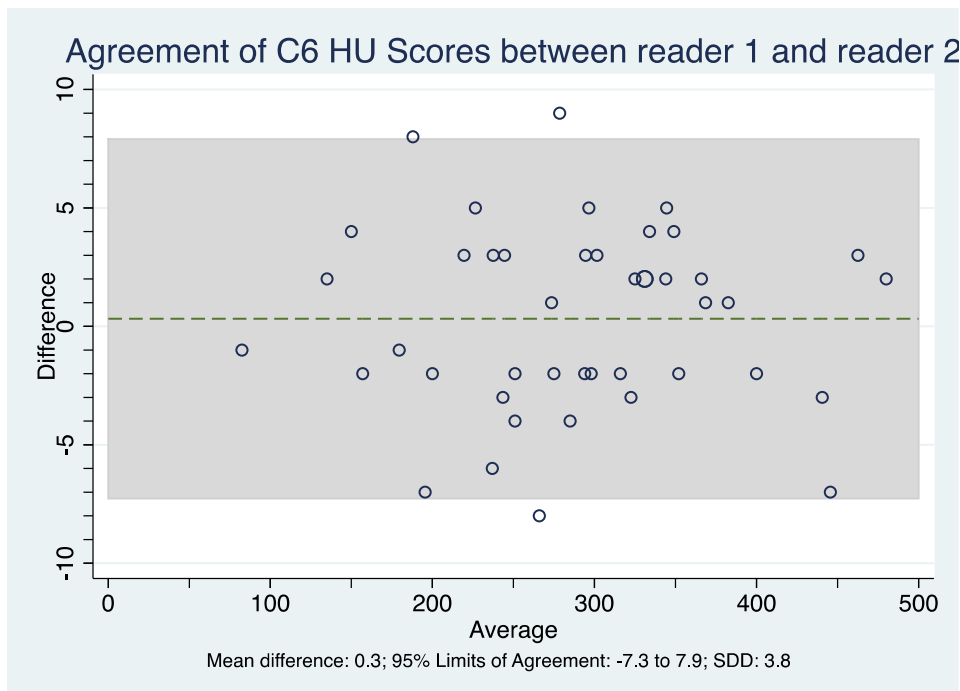

**Supplementary Figure S3.** Bland-Altman plot for C6 HU scores. HU – Hounsfield Units; SDD – smallest detectable difference

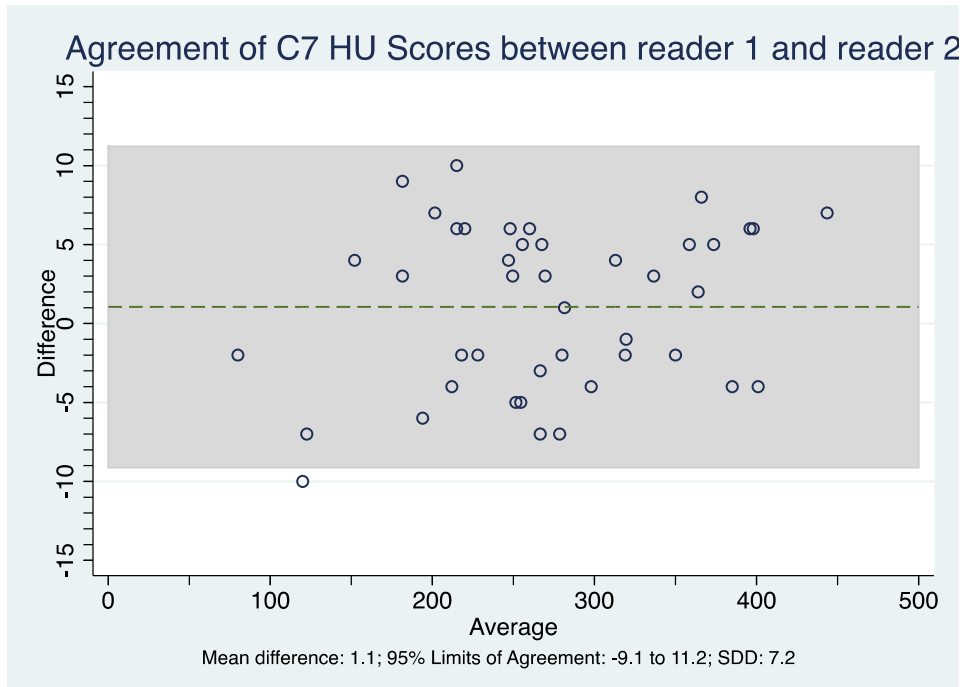

**Supplementary Figure S4.** Bland-Altman plot for C7 HU scores. HU – Hounsfield Units; SDD – smallest detectable difference



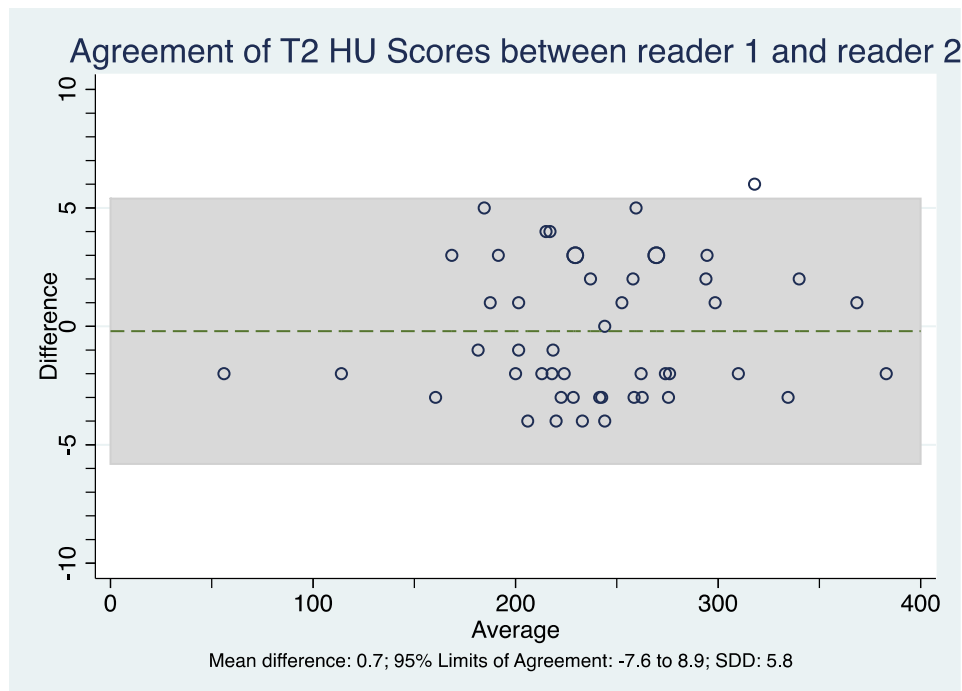

**Supplementary Figure S5.** Bland-Altman plot for T2 HU scores. HU – Hounsfield Units; SDD – smallest detectable difference

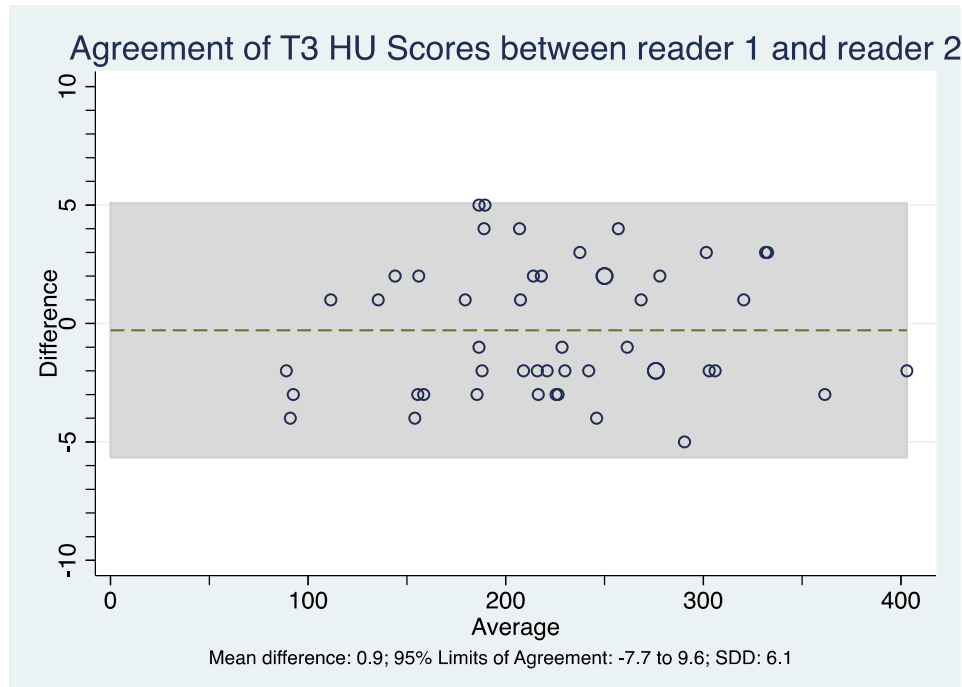

**Supplementary Figure S6.** Bland-Altman plot for T3 HU scores. HU – Hounsfield Units; SDD – smallest detectable difference

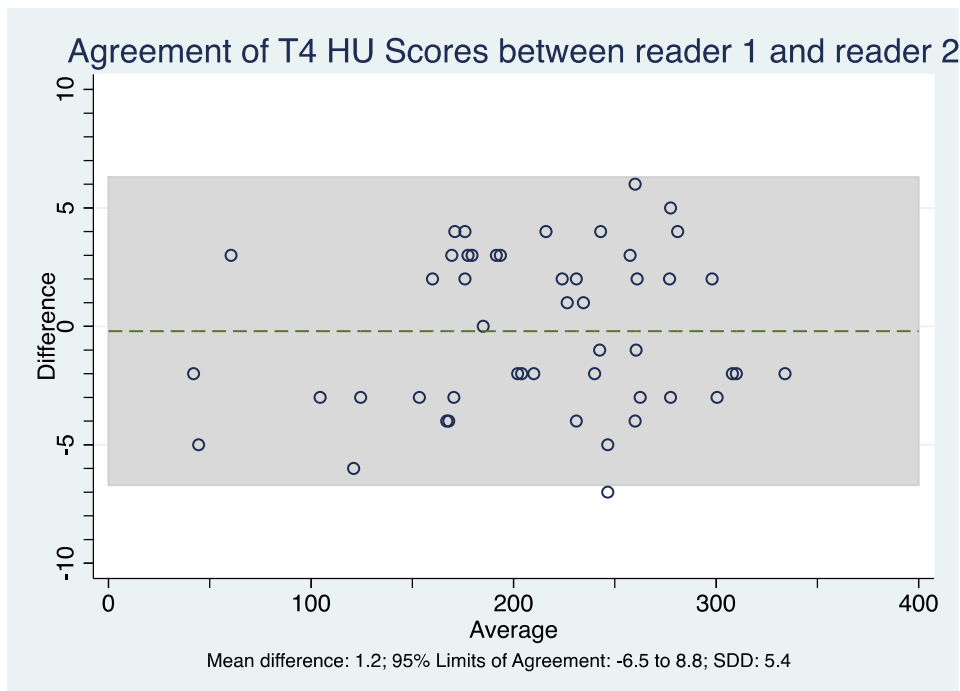

**Supplementary Figure S7.** Bland-Altman plot for T4 HU scores. HU – Hounsfield Units; SDD – smallest detectable difference

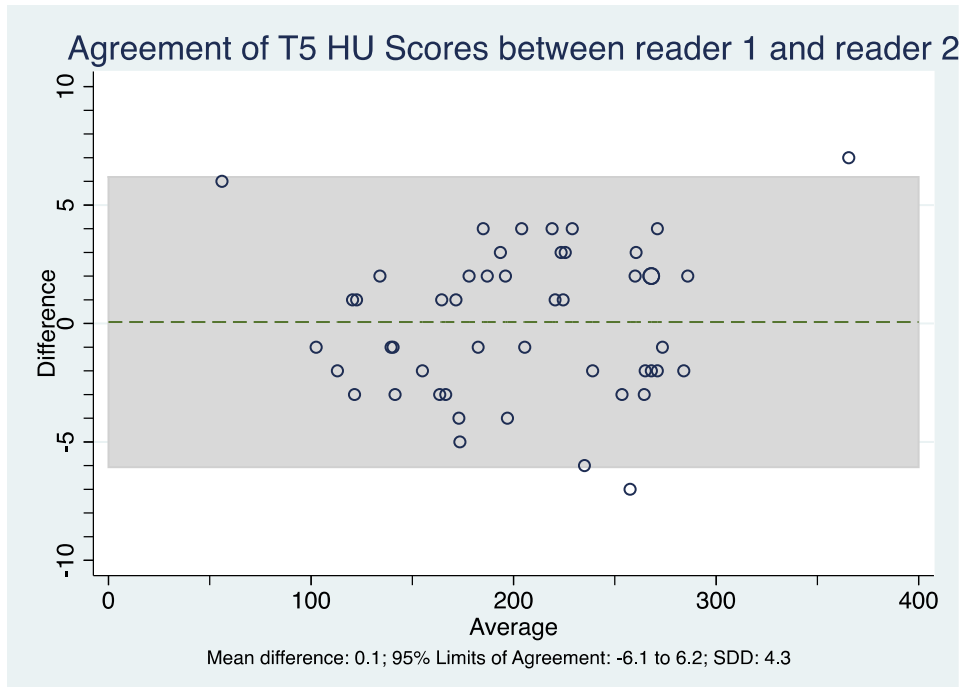

**Supplementary Figure S8.** Bland-Altman plot for T5 HU scores. HU – Hounsfield Units; SDD – smallest detectable difference

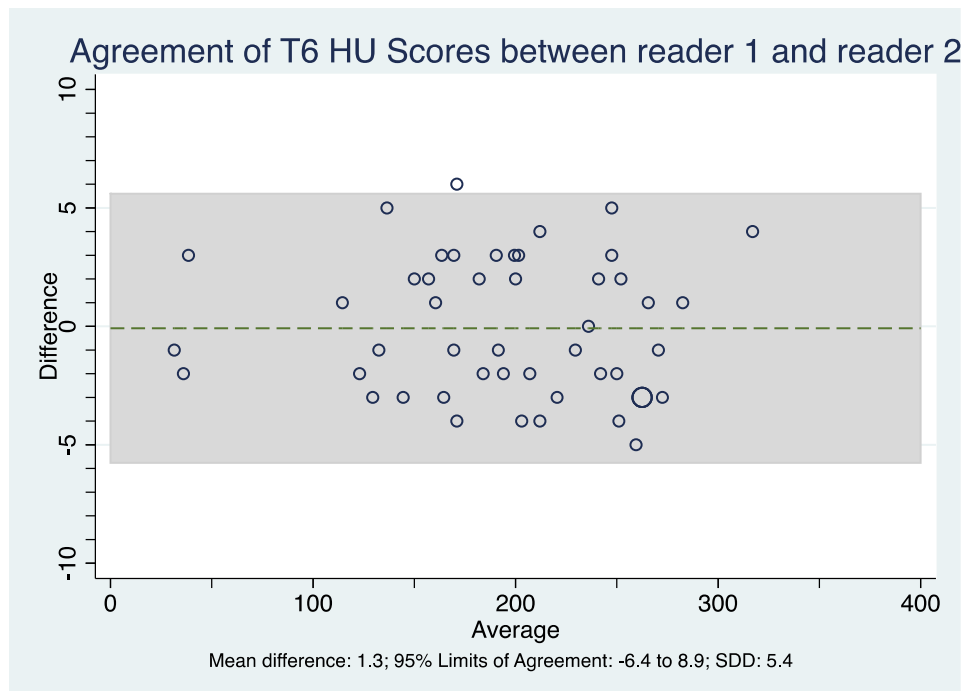

**Supplementary Figure S9.** Bland-Altman plot for T6 HU scores. HU – Hounsfield Units; SDD – smallest detectable difference

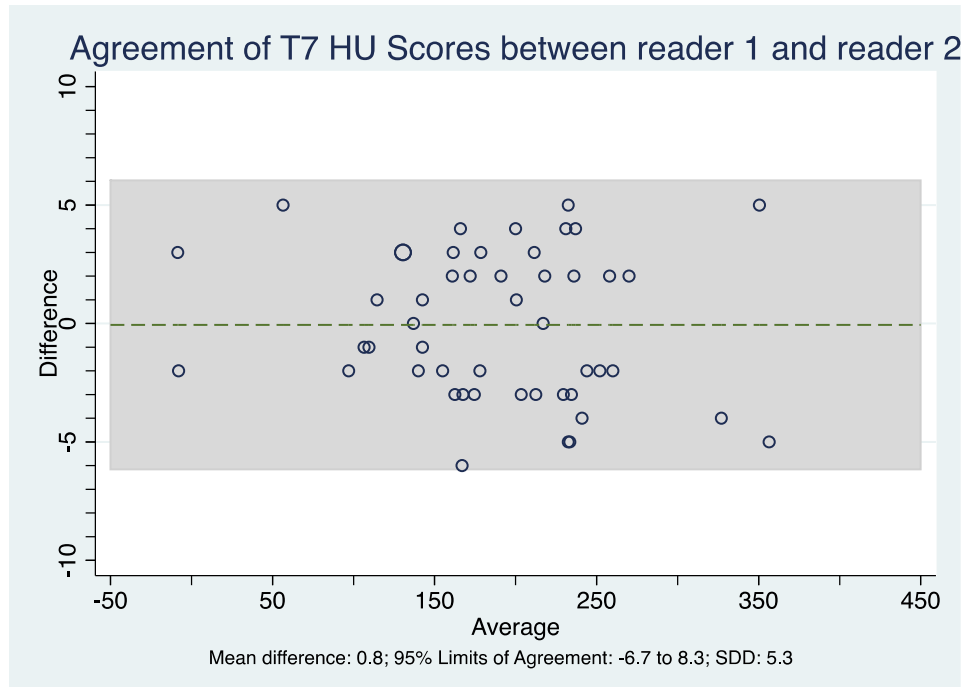

**Supplementary Figure S10.** Bland-Altman plot for T7 HU scores. HU – Hounsfield Units; SDD – smallest detectable difference

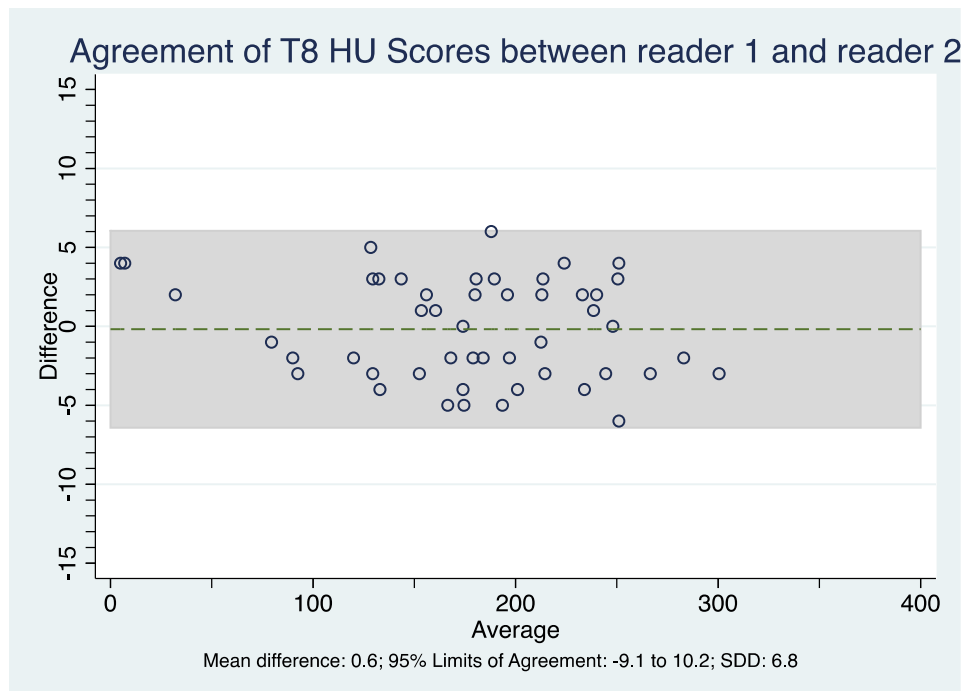

**Supplementary Figure S11.** Bland-Altman plot for T8 HU scores. HU – Hounsfield Units; SDD – smallest detectable difference

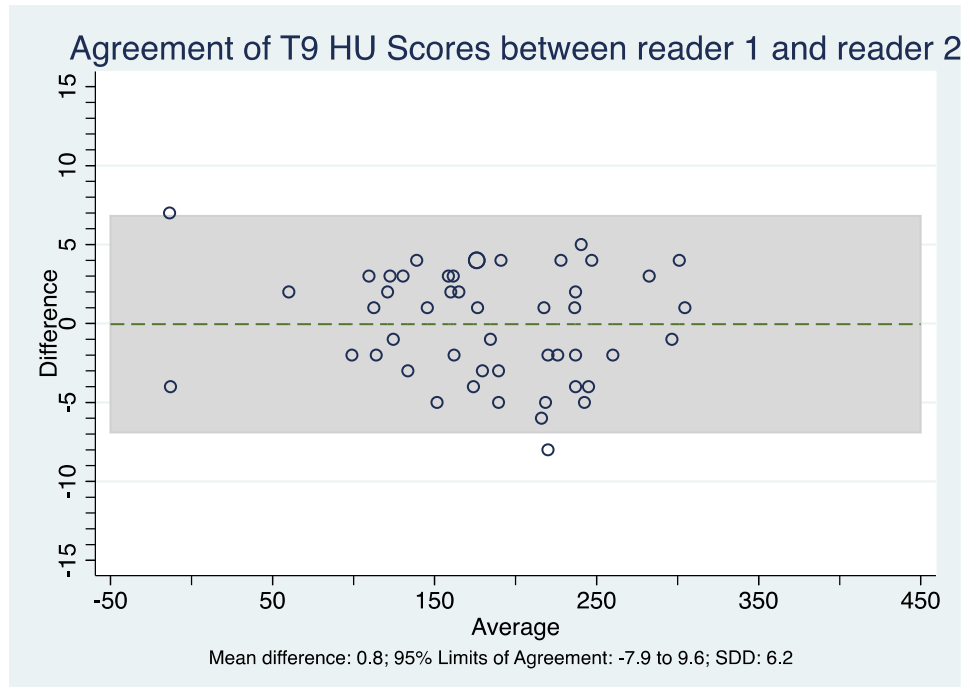

**Supplementary Figure S12.** Bland-Altman plot for T9 HU scores. HU – Hounsfield Units; SDD – smallest detectable difference

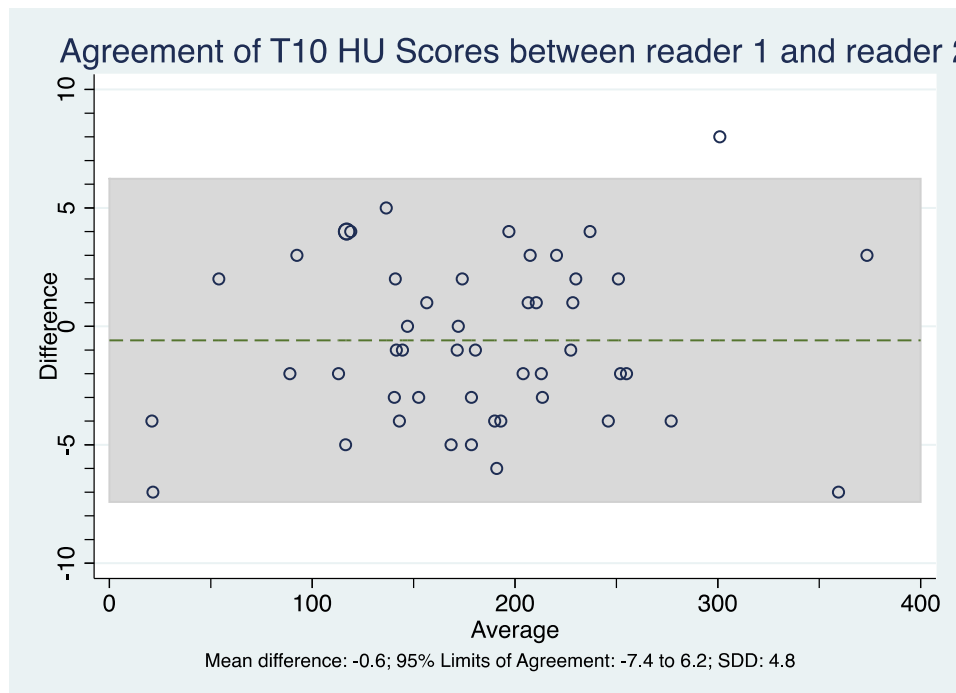

**Supplementary Figure S13.** Bland-Altman plot for T10 HU scores. HU – Hounsfield Units; SDD – smallest detectable difference

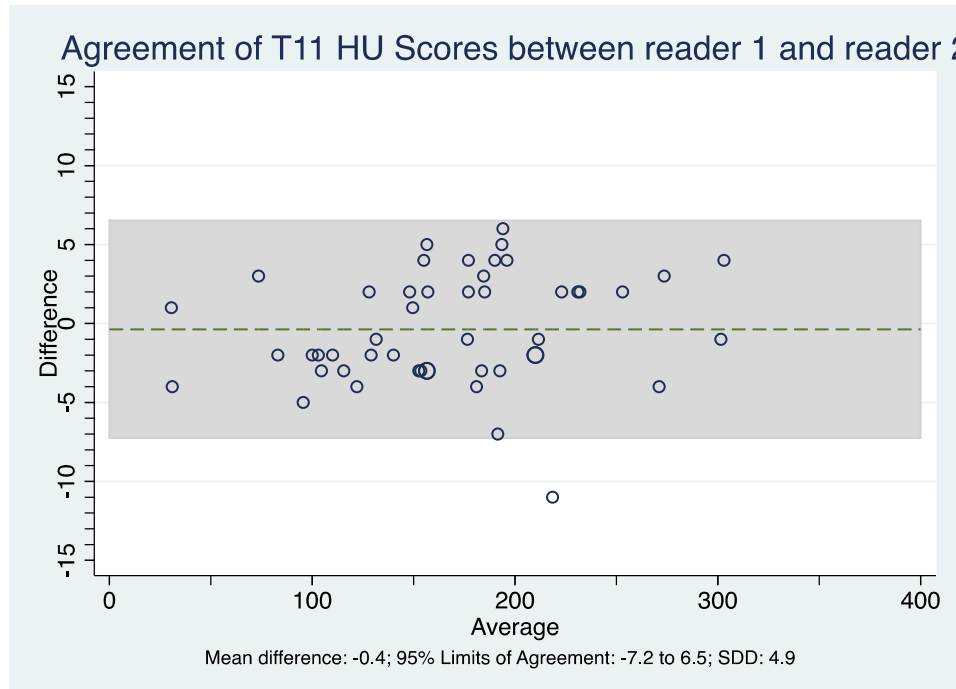

**Supplementary Figure S14.** Bland-Altman plot for T11 HU scores. HU – Hounsfield Units; SDD – smallest detectable difference

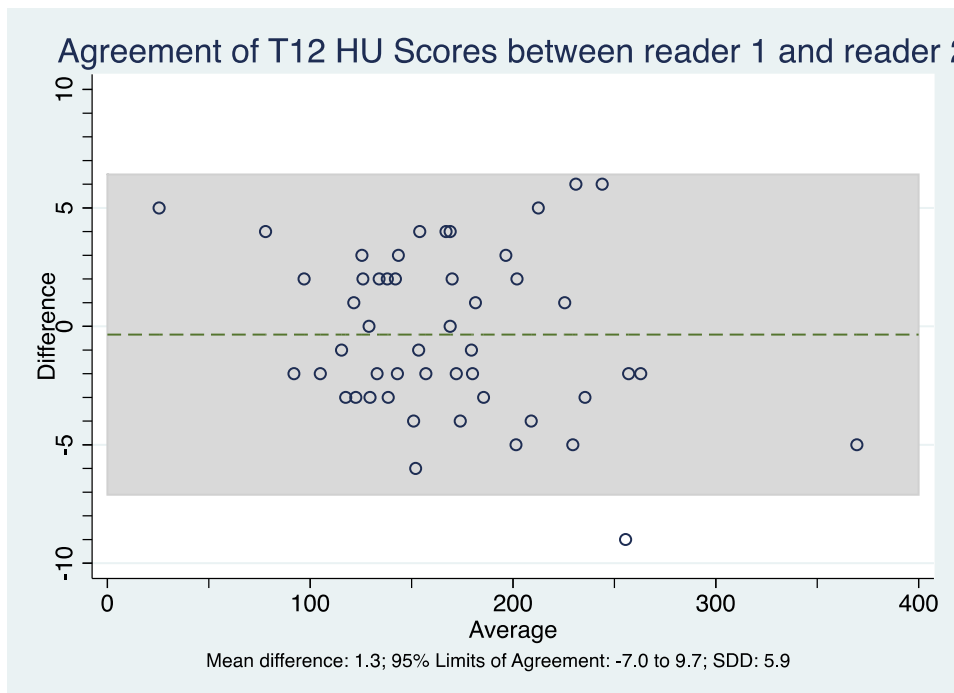

**Supplementary Figure S15.** Bland-Altman plot for T12 HU scores. HU – Hounsfield Units; SDD – smallest detectable difference

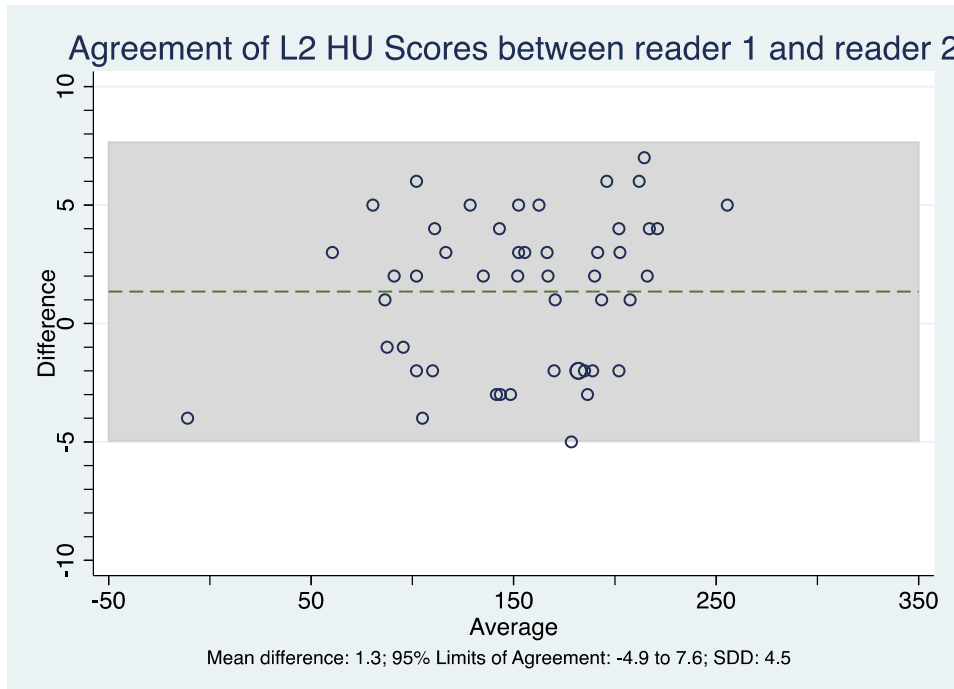

**Supplementary Figure S16.** Bland-Altman plot for L2 HU scores. HU – Hounsfield Units; SDD – smallest detectable difference

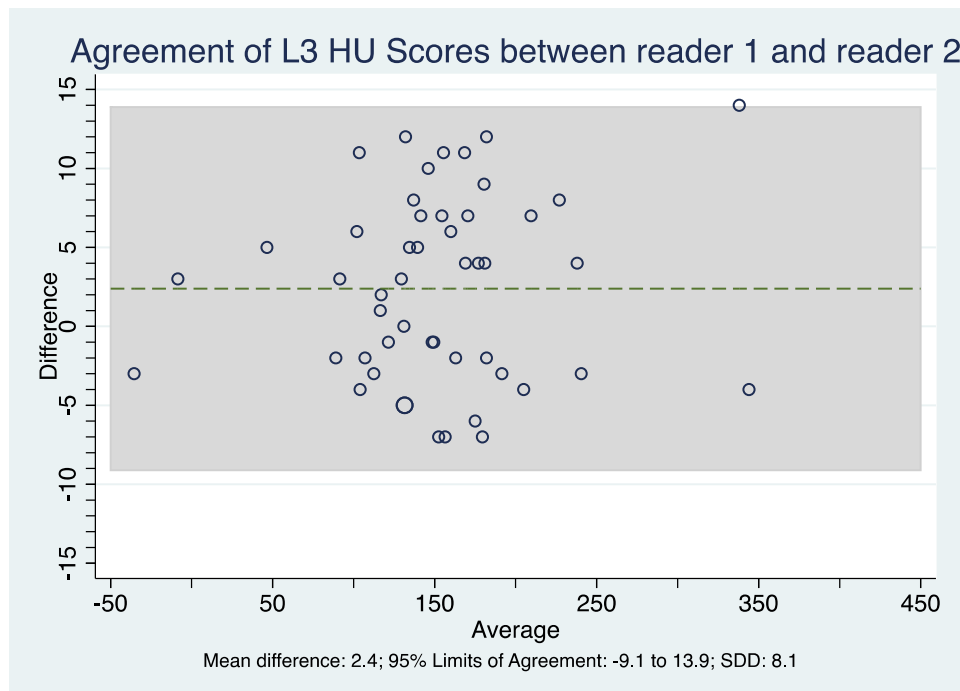

**Supplementary Figure S17.** Bland-Altman plot for L3 HU scores. HU – Hounsfield Units; SDD – smallest detectable difference

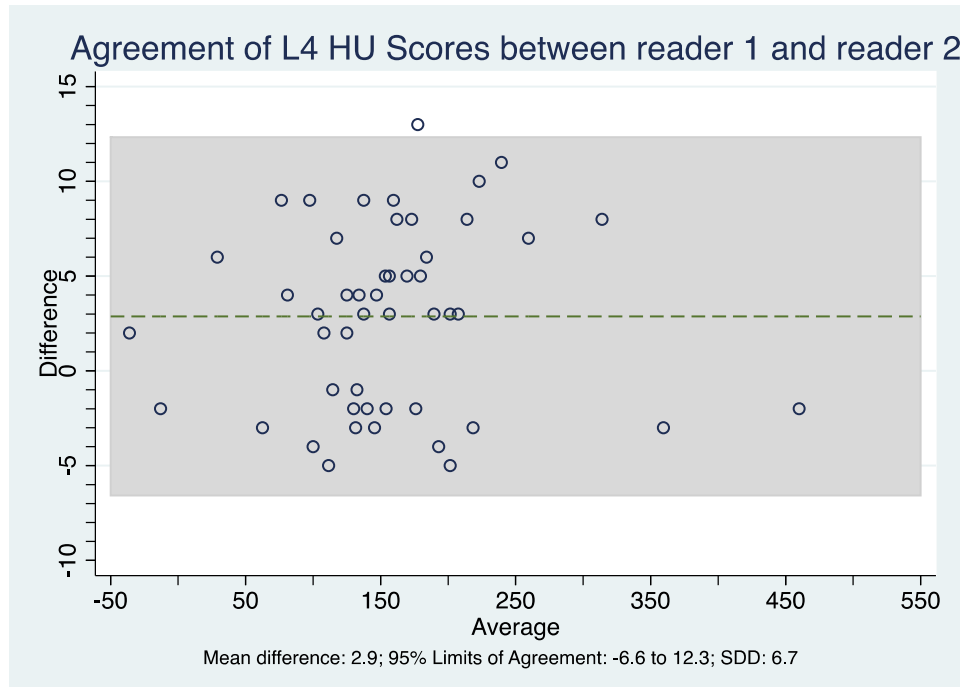

**Supplementary Figure S18.** Bland-Altman plot for L4 HU scores. HU – Hounsfield Units; SDD – smallest detectable difference

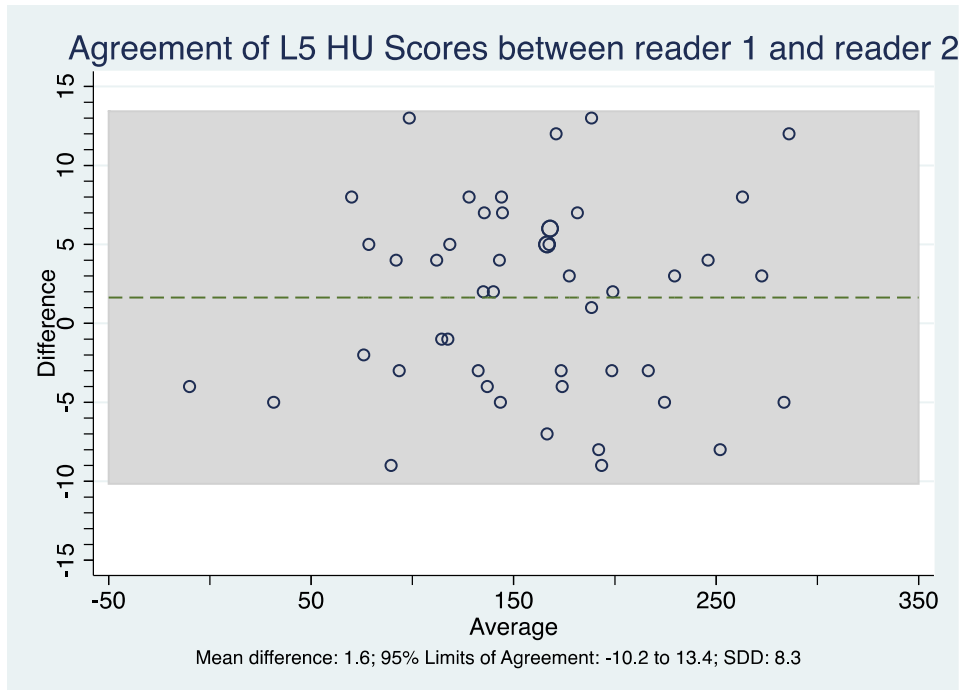

**Supplementary Figure S19.** Bland-Altman plot for L5 HU scores. HU – Hounsfield Units; SDD – smallest detectable difference



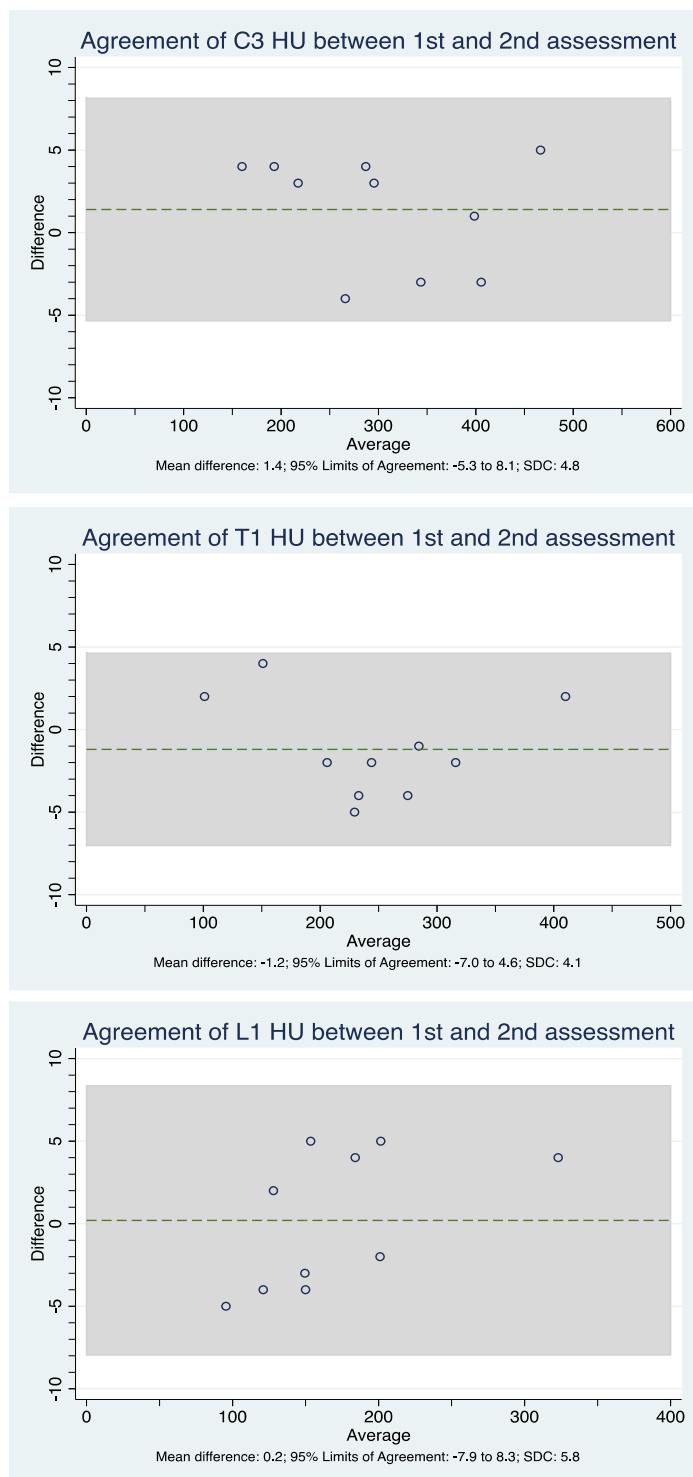

**Supplementary Figure S20.** Representative examples of Bland-Altman plots for the repeated measurements from reader 1 (C3, T1, L1).
